# Supplementary material for: Sex-specific differences in DNA double-strand break repair of cycling human lymphocytes during aging
Source: Aging (Albany NY). 2021 Sep 10;13(17):21066–89. doi: 10.18632/aging.203519 (PMC8457596; doi:10.18632/aging.203519)
Supplement: Supplementary Table 1 [file aging-13-203519-s002.xlsx]

## Sheet: Tabelle1
Supplementary Table 1. SI Statistics.
Figure 1
DSB repair pathway activity (normalized data, young 100%)
DSB repair pathway	Sex	Pairwise Comparisons		Mann Whitney test		Mean DSB repair frequency (x10-2)#
		pairs (n)		sig.	p value	young	old
NHEJ	female	young (20)	old (8)	**	0.0039	8.00	3.22
	male	young (14)	old (10)	*	0.0260	2.80	5.87
MMEJ	female	young (16)	old (11)	**	0.0079	0.12	0.08
	male	young (15)	old (13)	n.s.	0.5860	0.13	0.12
HR + SSA	female	young (24)	old (7)	trend	0.0761	0.78	0.38
	male	young (12)	old (7)	n.s.	0.5358	0.49	0.66
HR	female	young (10)	old (7)	n.s.	0.3638	0.19	0.15
	male	young (12)	old (13)	n.s.	0.8517	0.18	0.13
# Formular, see Figure S1e
Figure S2a
DSB repair pathway activity in both sexes (normalized data, young 100%)
DSB repair pathway	Sex	Pairwise Comparisons		Mann Whitney test		Mean DSB repair frequency (x10-2)#
		pairs (n)		sig.	p value	young	old
NHEJ	both	young (36)	old (21)	n.s.	0.5381	5.92	5.34
MMEJ	both	young (33)	old (29)	trend	0.0990	0.13	0.09
HR + SSA	both	young (37)	old (20)	trend	0.0573	0.69	0.52
HR	both	young (24)	old (21)	n.s.	0.2728	0.18	0.13
# Formular, see Figure S1e
Figure S2b
DSB repair pathway activity (absolute frequencies)
DSB repair pathway	Sex	Pairwise Comparisons		Mann Whitney test		Mean DSB repair frequency (x10-2)#
		pairs (n)		sig.	p value	young	old
NHEJ	female	young (23)	old (8)	*	0.0299	8.03	3.22
	male	young (15)	old (13)	**	0.0071	3.00	6.64
MMEJ	female	young (17)	old (11)	n.s.	0.1340	0.14	0.08
	male	young (16)	old (18)	n.s.	0.9052	0.12	0.10
HR + SSA	female	young (26)	old (7)	*	0.0269	0.79	0.38
	male	young (12)	old (13)	n.s.	0.8100	0.49	0.59
HR	female	young (10)	old (7)	n.s.	0.5362	0.19	0.15
	male	young (14)	old (14)	n.s.	0.8743	0.18	0.12
# Formular, see Figure S1e
DSB repair pathway	Age Group	Pairwise Comparisons		Mann Whitney test
		pairs (n)		sig.	p value
NHEJ	young	female (23)	male (15)	***	0.0008
	old	female (8)	male (13)	*	0.0446
MMEJ	young	female (17)	male (16)	n.s.	0.1364
	old	female (11)	male (18)	n.s.	0.9824
HR + SSA	young	female (26)	male (12)	trend	0.0657
	old	female (7)	male (13)	n.s.	0.8773
HR	young	female (10)	male (14)	n.s.	0.2847
	old	female (7)	male (14)	n.s.	0.5353
Figure 2
Cell cycle and cell death
Sex	cell fraction	Pairwise Comparisons		Mann Whitney test
		pairs (n)		sig.	p value
females	G1	young (11)	old (8)	trend	0.0759
	S	young (11)	old (8)	n.s.	0.2006
	G2/M	young (11)	old (8)	*	0.0186
	subG1	young (11)	old (8)	***	0.0003
males	G1	young (2)	old (6)	n.s.	0.8571
	S	young (2)	old (6)	n.s.	0.4286
	G2/M	young (2)	old (6)	n.s.	0.6429
	subG1	young (2)	old (6)	trend	0.0714
Figure 3a
53BP1 foci analysis
Sex	Time point/ treatment	Pairwise Comparisons		Mann Whitney test
		Pairs (n)		sig.	p value
female	control	young (13)	old (10)	n.s.	0.5149
	1 h post IR	young (14)	old (11)	n.s.	0.5290
	6 h post IR	young (13)	old (11)	n.s.	0.6430
	24 h post IR	young (14)	old (10)	n.s.	0.8376
male	control	young (5)	old (5)	n.s.	>0.9999
	1 h post IR	young (5)	old (6)	n.s.	0.9307
	6 h post IR	young (4)	old (7)	n.s.	0.4121
	24 h post IR	young (5)	old (7)	n.s.	0.3290
Figure 3c
γH2AX foci analysis
Sex	Time point/ treatment	Pairwise Comparisons		Mann Whitney test
		Pairs (n)		sig.	p value
female	control	young (8)	old (8)	n.s.	0.9591
	1 h post IR	young (8)	old (8)	n.s.	0.7984
	6 h post IR	young (8)	old (8)	n.s.	0.9551
	24 h post IR	young (8)	old (8)	n.s.	0.5054
male	control	young (8)	old (8)	trend	0.0650
	1 h post IR	young (8)	old (8)	n.s.	0.5737
	6 h post IR	young (8)	old (8)	n.s.	0.2810
	24 h post IR	young (8)	old (8)	**	0.0070
Sex	Age group	Pairwise Comparisons		Wilcoxon signed-rank test
				sig.	p value
female	young	control	1h post IR	**	0.0078
		control	6h post IR	*	0.0156
		control	24h post IR	trend	0.0781
	old	control	1h post IR	**	0.0078
		control	6h post IR	*	0.0313
		control	24h post IR	*	0.0234
male	young	control	1h post IR	**	0.0078
		control	6h post IR	**	0.0078
		control	24h post IR	**	0.0078
	old	control	1h post IR	**	0.0078
		control	6h post IR	*	0.0313
		control	24h post IR	**	0.0078
Figure S4
Colocalisation of γH2AX with 53BP1 foci
Sex	Time point/ treatment	Pairwise Comparisons		Mann Whitney test
		Pairs (n)		sig.	p value
female	control	young (8)	old (8)	n.s.	0.7984
	1 h post IR	young (8)	old (8)	n.s.	0.5737
	6 h post IR	young (8)	old (8)	n.s.	0.2300
	24 h post IR	young (8)	old (8)	n.s.	0.1037
male	Control	young (8)	old (8)	n.s.	0.7984
	1 h post IR	young (8)	old (8)	n.s.	0.7209
	6 h post IR	young (8)	old (8)	n.s.	0.5358
	24 h post IR	young (8)	old (8)	n.s.	0.9591
Age group	Time point/ treatment	Pairwise Comparisons		Mann Whitney test
		Pairs (n)		sig.	p value
young	control	female(8)	male (8)	n.s.	0.3282
	1 h post IR	female(8)	male (8)	n.s.	0.2345
	6 h post IR	female(8)	male (8)	*	0.0202
	24 h post IR	female(8)	male (8)	*	0.0103
old	Control	female(8)	male (8)	n.s.	0.3823
	1 h post IR	female(8)	male (8)	n.s.	0.3282
	6 h post IR	female(8)	male (8)	n.s.	0.8048
	24 h post IR	female(8)	male (8)	*	0.0281
Figure 4a
Western Blots DDR proteins
Protein	Sex	Pairwise Comparisons		Mann Whitney test
		pairs (n)		sig.	p value
KU70	female	young (11)	old (11)	*	0.0336
	male	young (9)	old (7)	n.s.	0.5360
XRCC4	female	young (9)	old (9)	n.s.	0.9314
	male	young (6)	old (6)	n.s.	0.7857
LIG4	female	young (11)	old (10)	n.s.	0.8053
	male	young (9)	old (9)	n.s.	0.8633
MRE11	female	young (9)	old (6)	trend	0.0663
	male	young (4)	old (2)	n.s.	0.700
CtIP	female	young (6)	old (4)	n.s.	0.4762
	male	young (3)	old (3)	n.s.	0.7000
EXO1	female	young (8)	old (4)	n.s.	0.2141
	male	young (1)	old (2)	n.a.	n.a.
FEN1	female	young (9)	old (6)	n.s.	0.7756
	male	young (3)	old (3)	n.s.	0.4000
LIG3	female	young (11)	old (11)	n.s.	0.2122
	male	young (9)	old (9)	n.s.	0.2973
BLM	female	young (9)	old (6)	*	0.0360
	male	young (9)	old (7)	n.s.	0.4698
WRN	female	young (9)	old (6)	n.s.	0.9546
	male	young (9)	old (7)	n.s.	0.1142
BRCA1	female	young (8)	old (4)	n.s.	0.4606
	male	young (7)	old (6)	n.s.	0.4452
RAD51	female	young (9)	old (6)	trend	0.0879
	male	young (3)	old (3)	n.s.	1.0000
ATM	female	young (10)	old (8)	*	0.0434
	male	young (7)	old (5)	n.s.	0.3434
p53	female	young (9)	old (6)	n.s.	0.3277
	male	young (3)	old (3)	n.s.	0.2000
SIRT1	female	young (9)	old (6)	n.s.	0.9546
	male	young (3)	old (3)	n.s.	0.7000
SIRT6	female	young (6)	old (4)	n.s.	0.6095
	male	young (3)	old (3)	n.s.	0.7000
Figure 4b
RT-qPCR DDR proteins
Gene	Sex	Pairwise Comparisons		Mann Whitney test
		pairs (n)		sig.	p value
KU70	female	young (3)	old (5)	*	0.0357
	male	young (3)	old (4)	n.s.	0.4000
BLM	female	young (3)	old (5)	*	0.0357
	male	young (3)	old (4)	n.s.	0.6286
ATM	female	young (3)	old (5)	n.s.	0.7857
	male	young (3)	old (4)	n.s.	0.2286
Figure 5
DSBR activity BLMkd
DSB repair pathway	Age group (n)	Pairwise Comparisons		Wilcoxon signed-rank test
		pairs (n)		sig.	p value
NHEJ	young (5)	control	BLMkd	n.s.	0.8125
	old (4)	control	BLMkd	n.s.	0.6250
MMEJ	young (9)	control	BLMkd	*	0.0195
	old (9)	control	BLMkd	n.s.	>0.9999
BLM foci analysis
Sex	Time point/treatment	Pairwise Comparisons		Mann Whitney test
		Pairs (n)		sig.	p value
female	control	young (13)	old (11)	n.s.	0.3833
	24 h post IR	young (13)	old (11)	*	0.0208
Figure S6
Cell cycle and cell death BLMkd
Age group (n)	cell fraction	Pairwise Comparisons		Wilcoxon signed-rank test
		pairs (n)		sig.	p value
young (4)	G1	control (4)	BLMkd (4)	n.s.	0.2500
	S	control (4)	BLMkd (4)	n.s.	0.2500
	G2/M	control (4)	BLMkd (4)	n.s.	0.6250
	subG1	control (4)	BLMkd (4)	n.s.	0.6250
old (4)	G1	control (4)	BLMkd (4)	n.s.	0.6250
	S	control (4)	BLMkd (4)	n.s.	0.6250
	G2/M	control (4)	BLMkd (4)	n.s.	0.8750
	subG1	control (4)	BLMkd (4)	n.s.	0.3750
Abbreviations:
sig.	significance
n.s.	not significant
trend	p<0.1
*	p<0.05
**	p<0.01
***	p<0.001
n.a.	not applicable
ATM	ataxia telangiectasia mutated
BLM	bloom syndrome protein
BRCA1	breast cancer susceptibility protein 1
CtIP	C-terminal binding protein-interacting protein
DDR	DNA damage response
DSB	DNA double-strand break
EXO1	exonuclease 1
FEN1	flap endonuclease 1
HR	homologous recombination
IR	ionizing radiation
LIG	ligase
MMEJ	microhomology-mediated end joining
MRE11	meiotic recombination 11 homolog
NHEJ	total non-homologous end joining
p53	protein 53
RAD51	radiation sensitive 51
SIRT	sirtuin
SSA	single-strand annealing
WRN	werner syndrome protein
XRCC4	x-ray repair cross complementing protein 4
